# Supplementary material for: Large-scale microsatellite development in grasspea (Lathyrus sativus L.), an orphan legume of the arid areas
Source: Springer Nature journal article supplement (doi:10.1186/1471-2229-14-65), 2014-03-17
Supplement: 12870_2013_1765_MOESM7_ESM.pdf [file 12870_2013_1765_MOESM7_ESM.pdf]

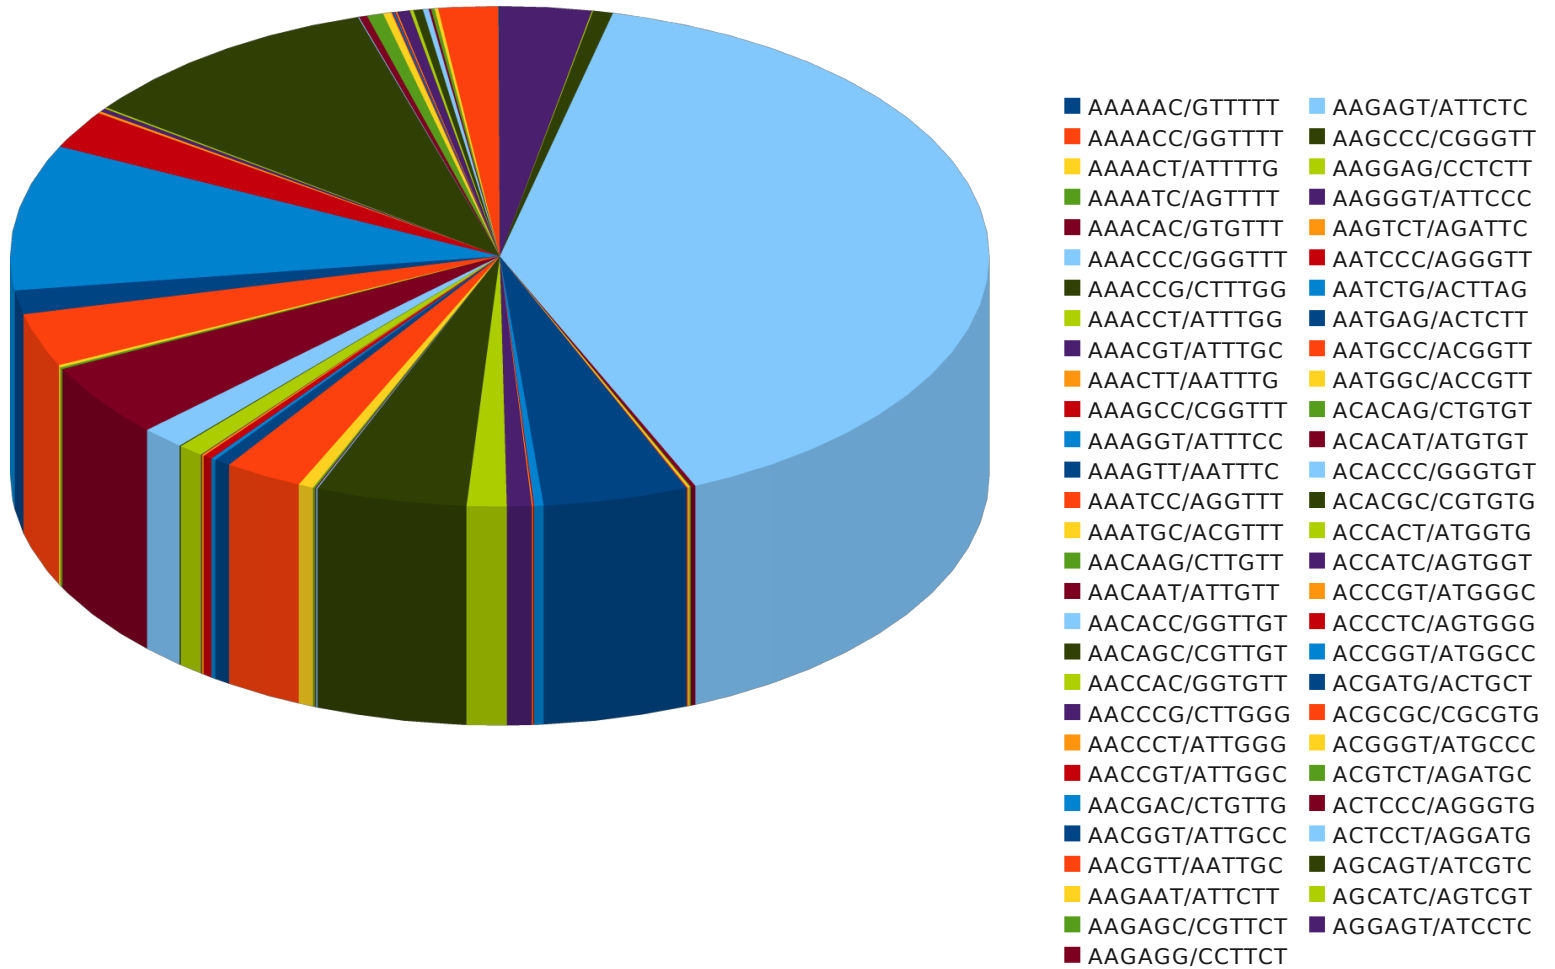

Figure S6 Hexanucleotide repeat motifs distribution
